# Supplementary material for: A flavonoid-rich extract of bergamot juice improves high-fat diet-induced intestinal permeability and associated hepatic damage in mice
Source: Royal Society of Chemistry journal article supplement (doi:10.1039/d4fo02538e), 2024-01-01

## Supplementary Information

### **A flavonoid-rich extract of bergamot juice improves high-fat diet-induced intestinal permeability and associated hepatic damage in mice**

Giovanni E. Lombardo<sup>1,2,3,4</sup>, Michele Navarra<sup>1\*</sup>, and Eleonora Cremonini<sup>4\*</sup>

*<sup>1</sup>Department of Chemical, Biological, Pharmaceutical and Environmental Sciences, University of Messina, Messina, Italy*

*<sup>2</sup>Prof. Antonio Imbesi Foundation, Messina, Italy*

*<sup>3</sup>Department of Medicine and Surgery, Kore University of Enna, Enna, Italy*

*<sup>4</sup>Department of Nutrition, University of California, Davis, USA*

\*Corresponding authors:

Eleonora Cremonini: [ecremonini@ucdavis.edu](mailto:ecremonini@ucdavis.edu)

Michele Navarra: [mnavarra@unime.it](mailto:mnavarra@unime.it)

**Supplementary Table 1** Composition of control and high-fat diets

**Supplementary Figure 1** Original Western blotting images presented in the study

**Supplementary Table 1.** Composition of control diet and high-fat diet. The original recipe is from Envigo (Envigo, Indianapolis, IN). The product codes are TD.06414 (high-fat diet) and TD.06416 (control diet). The original documents containing nutrient information and ingredients are found in Envigo (<http://www.envigo.com>). All ingredients are purchased from Dyets, Inc. (Dyets, Inc., Bethlehem, PA).

|                               | <b>Control Diet<br/>(3.7kcal/g)</b> | <b>High-Fat Diet<br/>(5.1kcal/g)</b> |
|-------------------------------|-------------------------------------|--------------------------------------|
| <b>Nutrient Information</b>   | <b>% kcal from</b>                  | <b>% kcal from</b>                   |
| Protein                       | 20.1                                | 18.4                                 |
| Carbohydrate                  | 69.8                                | 21.3                                 |
| Fat                           | 10.2                                | 60.3                                 |
|                               |                                     |                                      |
| <b>Ingredient</b>             | <b>g/kg</b>                         | <b>g/kg</b>                          |
| Casein                        | 210                                 | 265                                  |
| L-Cystine                     | 3                                   | 4                                    |
| Corn Starch                   | 280                                 |                                      |
| Dextrose                      | 50                                  | 160                                  |
| Sucrose                       | 325                                 | 90                                   |
| Lard                          | 20                                  | 310                                  |
| Soybean Oil                   | 20                                  | 30                                   |
| Cellulose                     | 37.15                               | 65.5                                 |
| Mineral Mix                   | 35                                  | 48                                   |
| Calcium Phosphate,<br>dibasic | 2                                   | 3.4                                  |
| Vitamin Mix                   | 15                                  | 21                                   |
| Choline Bitartrate            | 2.75                                | 3                                    |
| Yellow Food Color             | 0.1                                 |                                      |
| Pink Food Color               |                                     | 0.1                                  |

# Supplementary Figure 1 Original Western blotting images presented in the study

## Uncropped blots for Figure 2D

### Hepatic TGF $\beta$ 1 and corresponding loading control GADPH

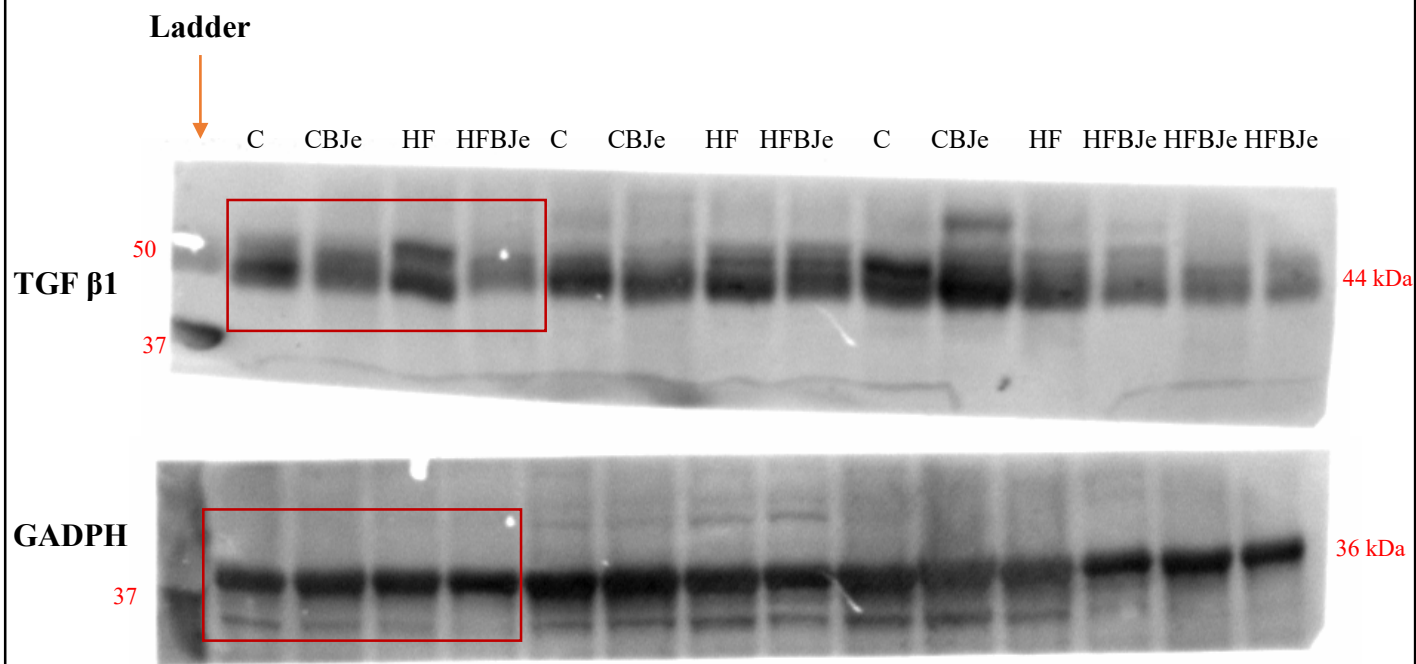

### Liver COL 1A1 and corresponding loading control GADPH

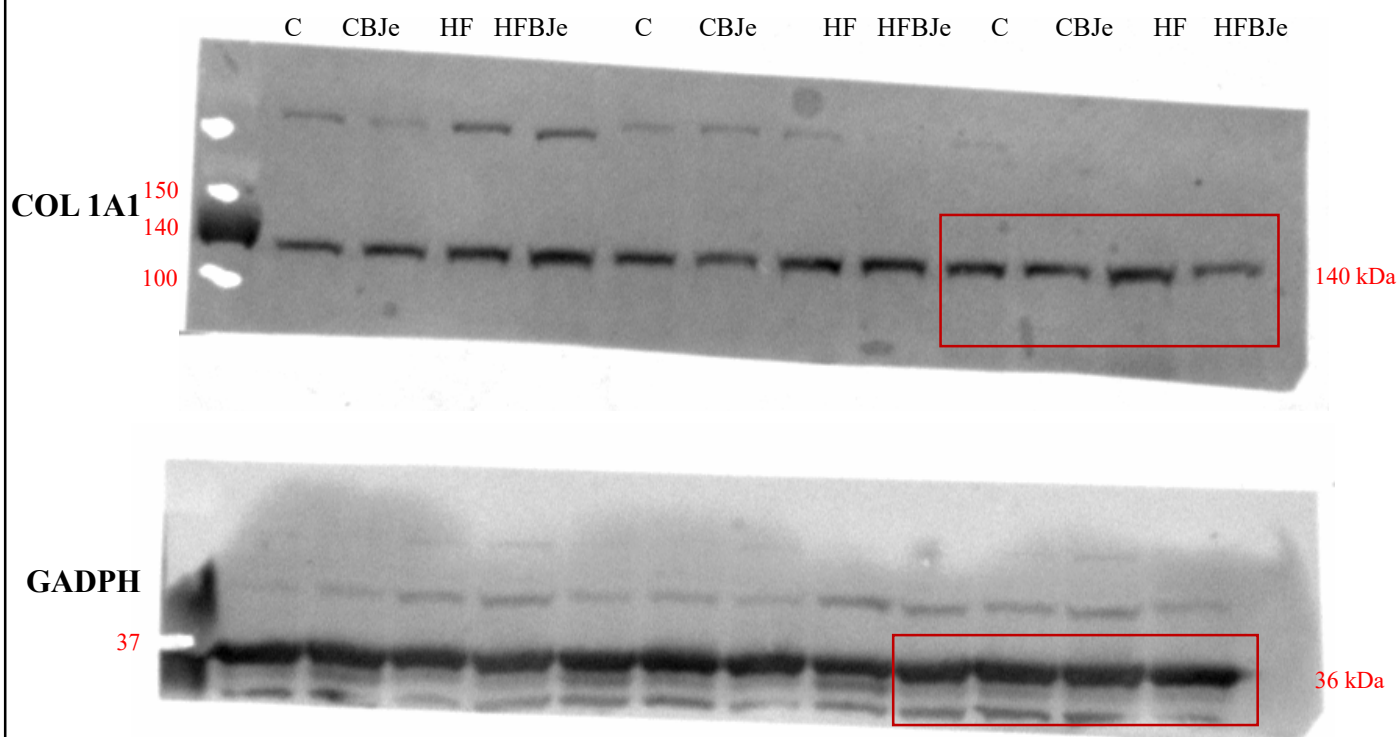

**Ileal Claudin-1 and corresponding loading control HSC-70**

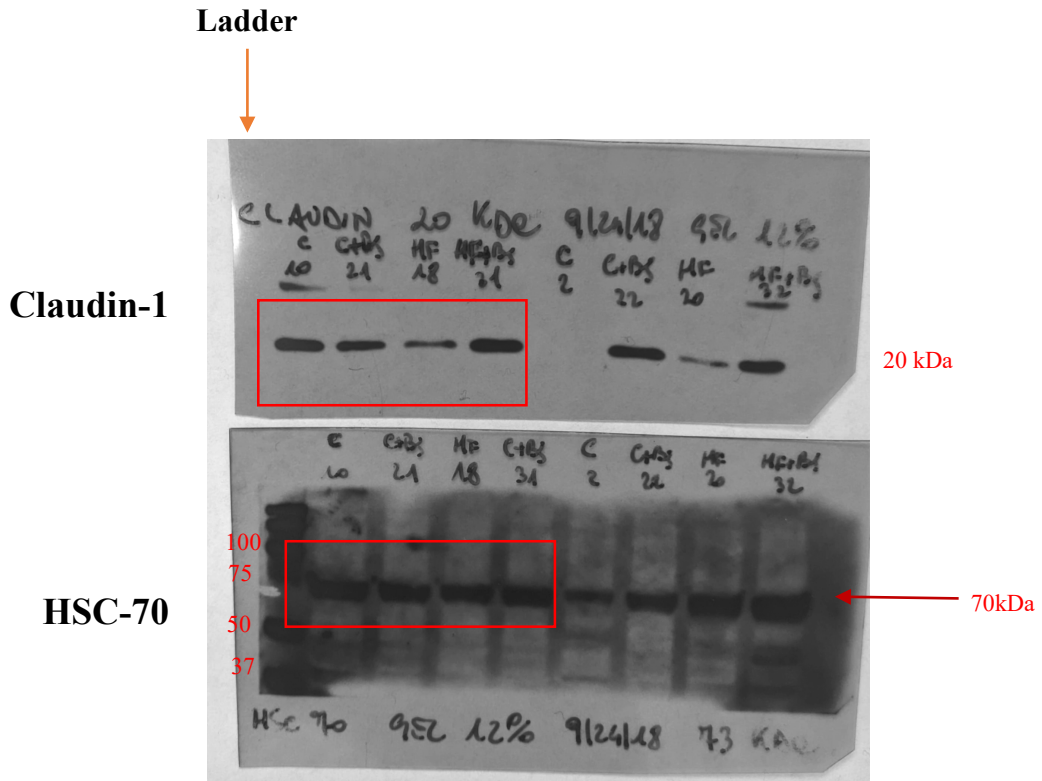

**Ileal Occludin and corresponding loading control HSC-70**

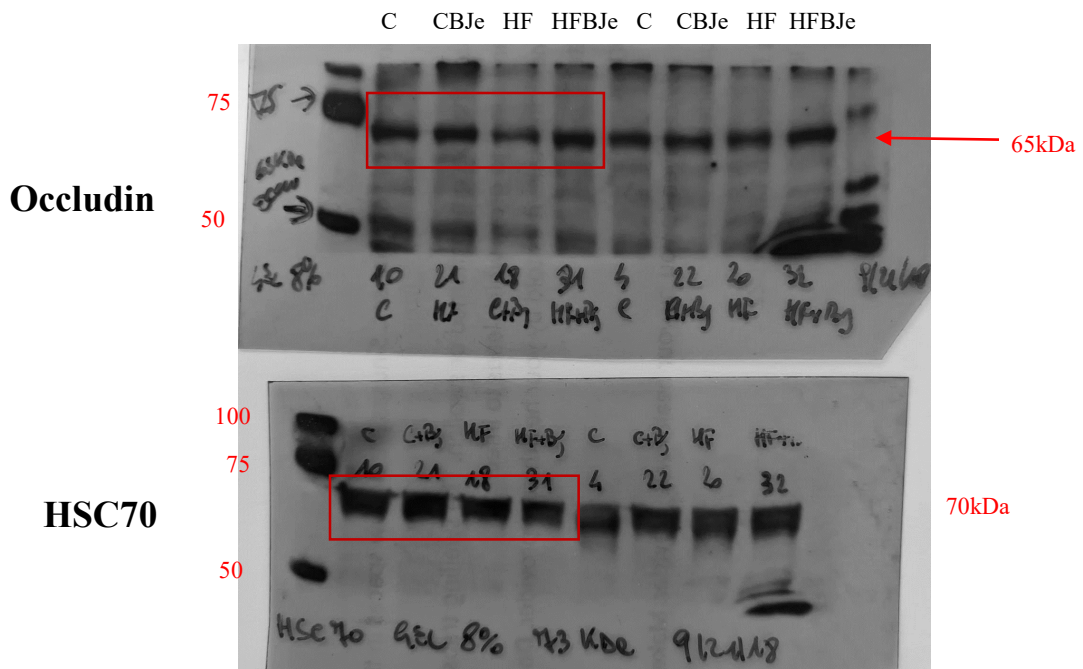

Uncropped blots for **Figure 3C**

**Ileal ZO-1 and corresponding loading control HSC-70**

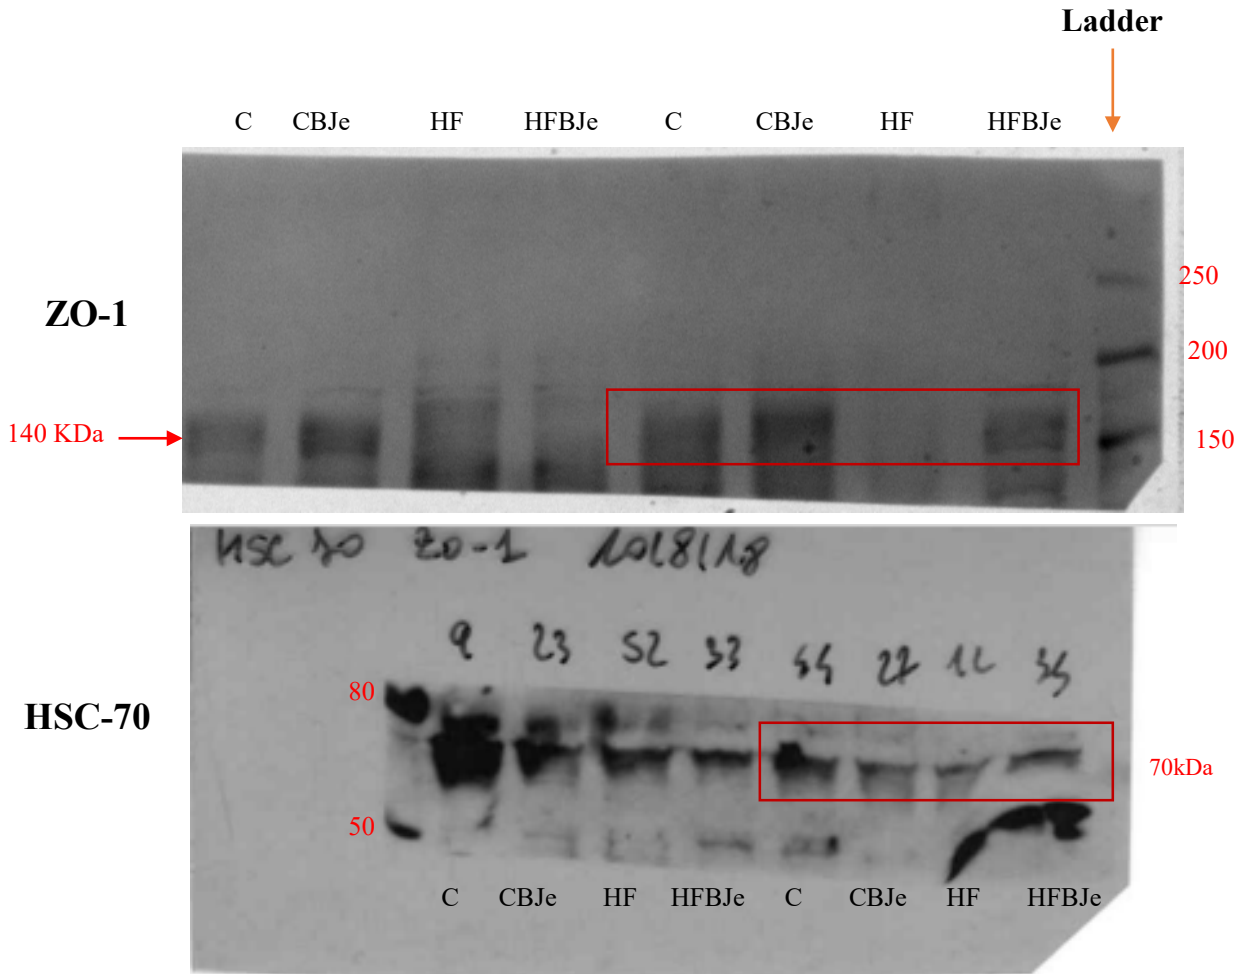

Uncropped blots for **Figure 4 A,B**

**Hepatic TLR-4 and corresponding loading control  $\beta$ -actin**

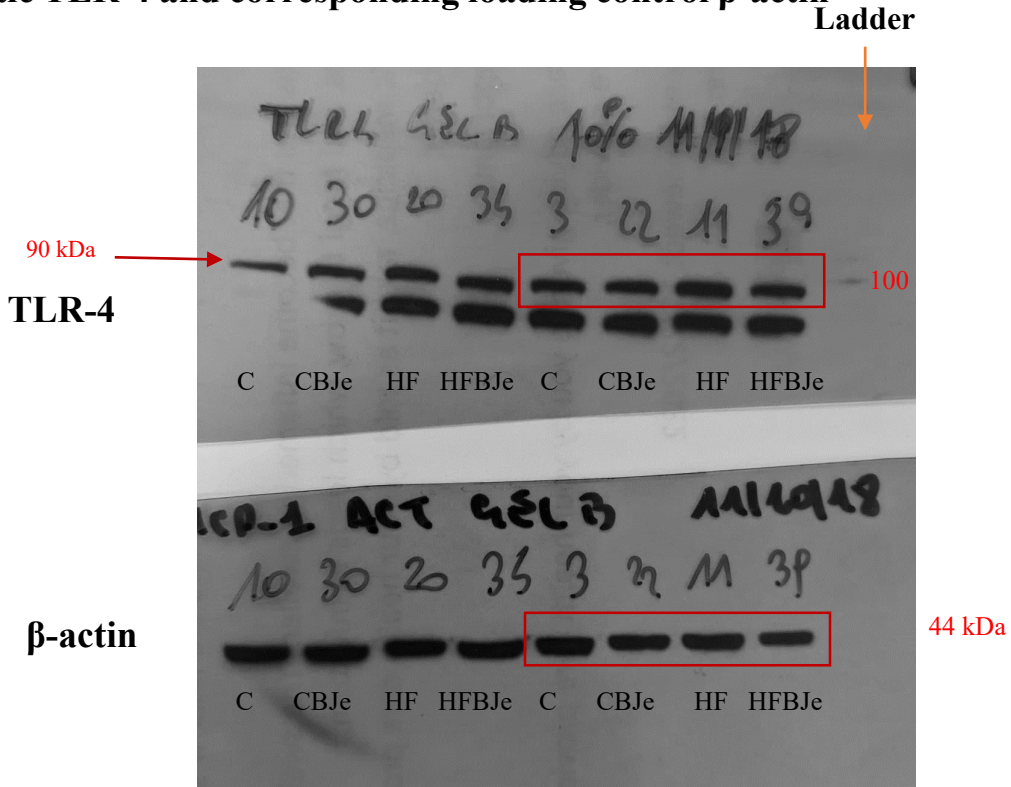

**Hepatic MyD88 and corresponding loading control  $\beta$ -actin**

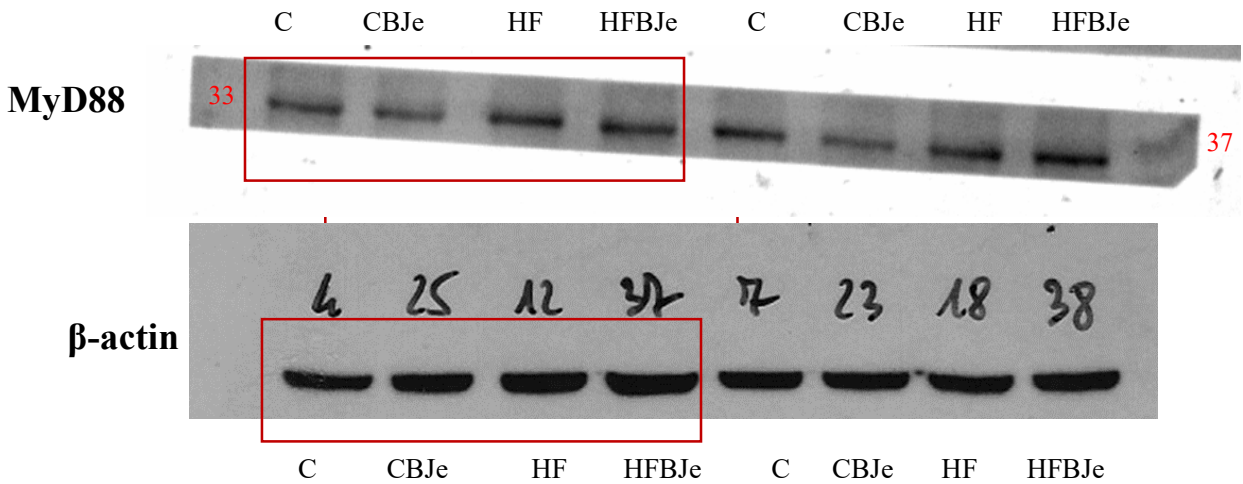

Uncropped blots for **Figure 4 A,B**

**Hepatic p-JNK and corresponding total JNK**

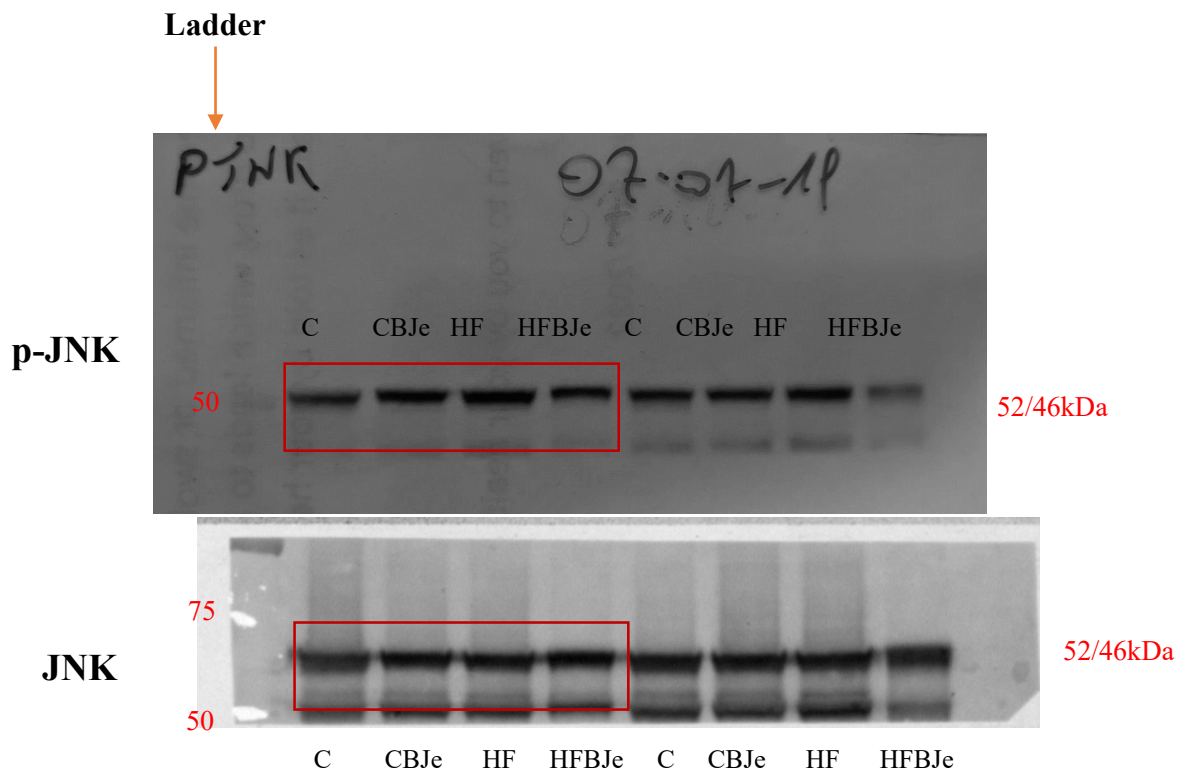

**Hepatic p-IKK $\alpha$ / $\beta$  and corresponding total IKK**

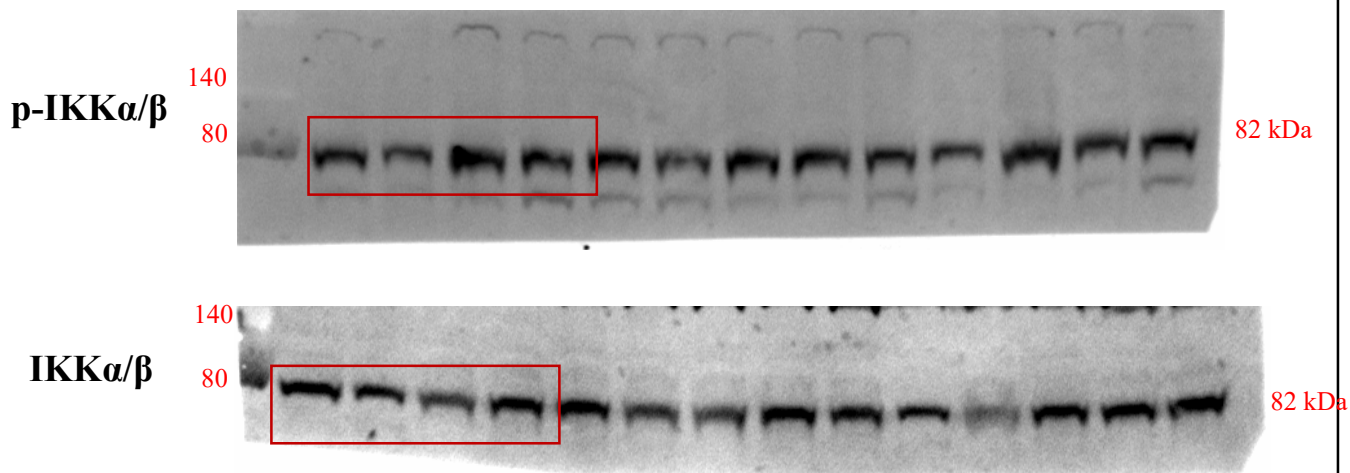



Uncropped blots for **Figure 5**

**Hepatic MCP-1 and corresponding loading control GADPH**

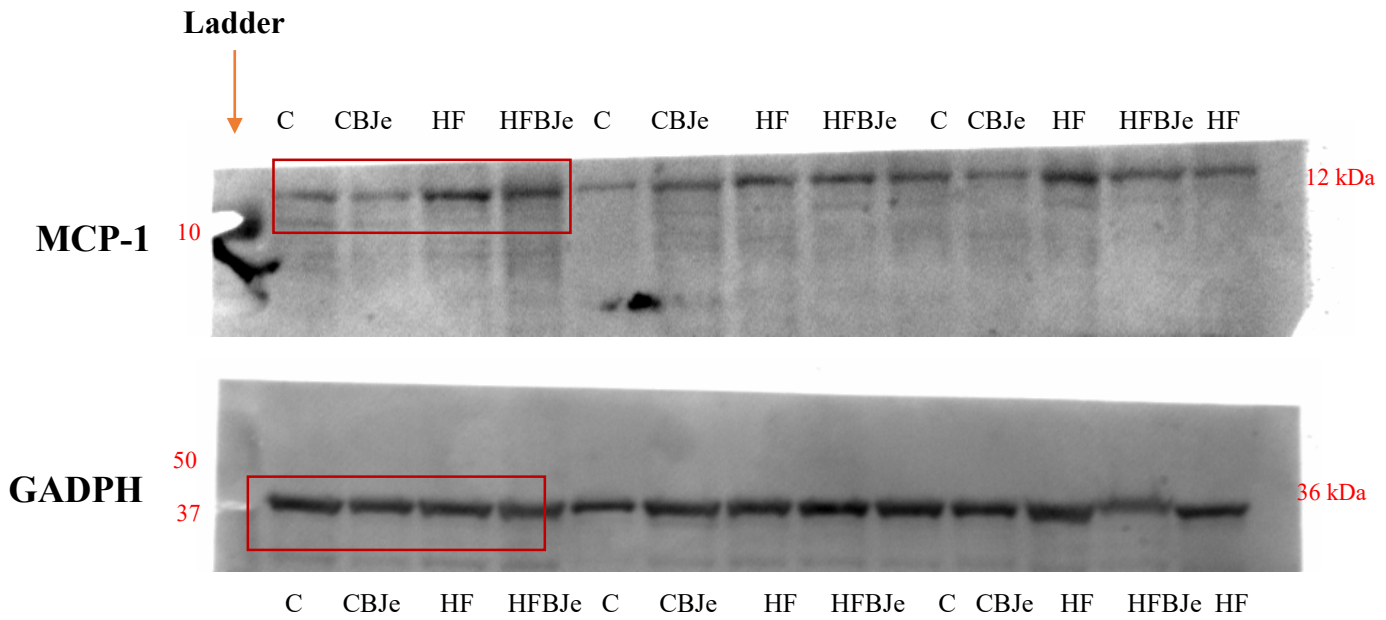

**Hepatic TNF- $\alpha$  and corresponding loading control GADPH**

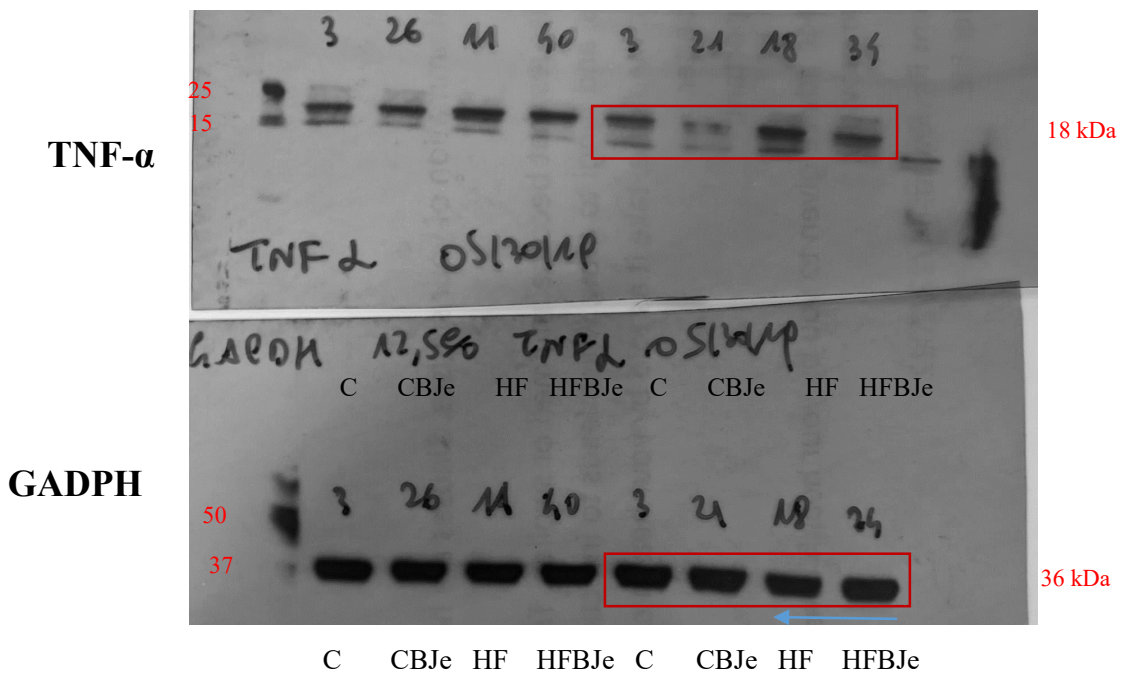

### Hepatic IL-6 and corresponding loading control GADPH

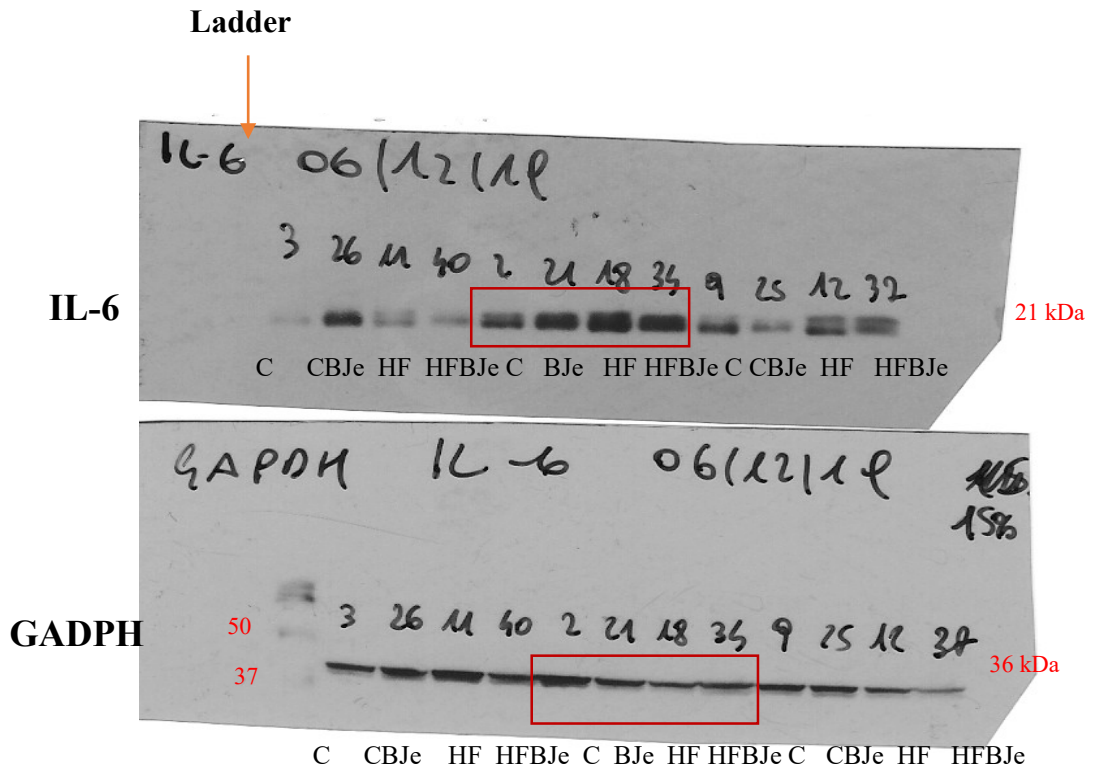

### Hepatic NOS2 and corresponding loading control GADPH

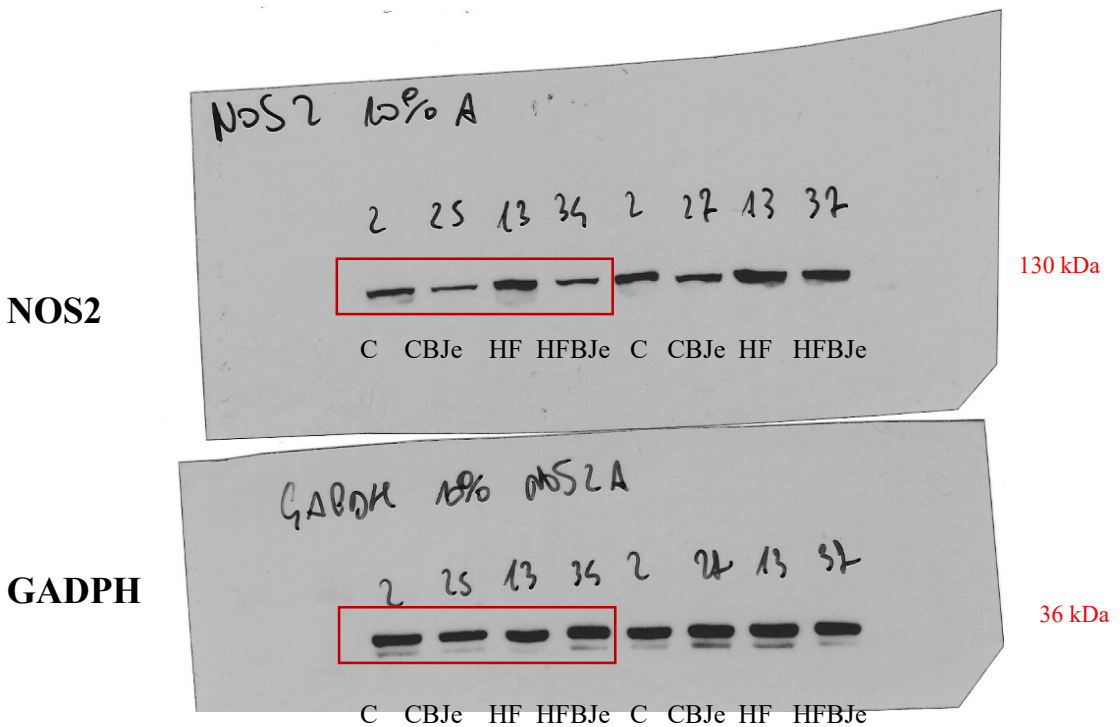

Uncropped blots for **Figure 5**

**Hepatic F4/80 and corresponding loading control GADPH**

Ladder

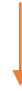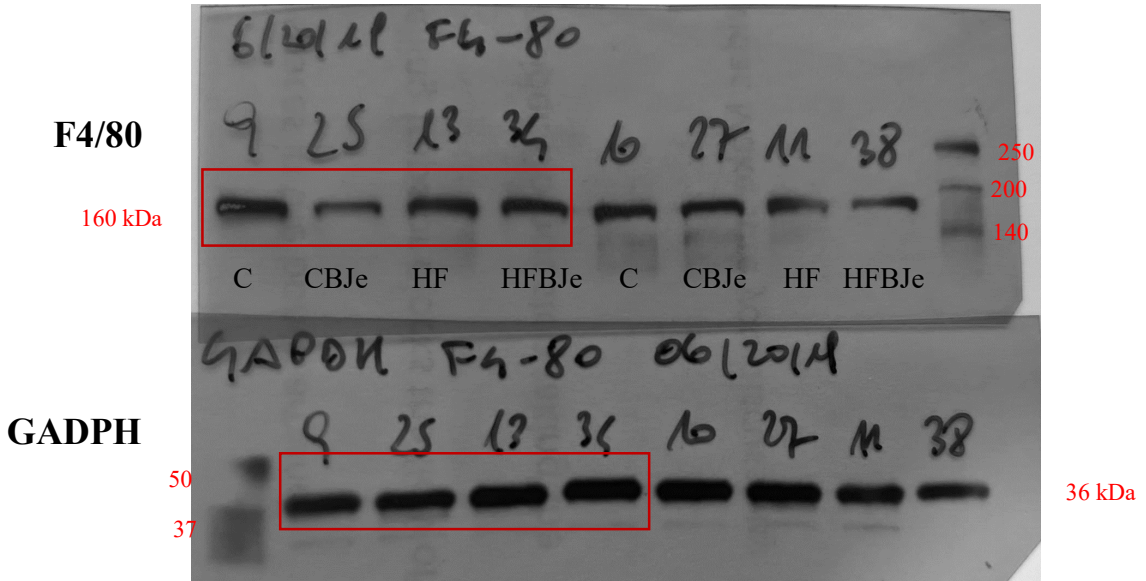

Supplement: d4fo02538e1.pdf [file d4fo02538e1.pdf]
